# Supplementary material
Source: PubMed Central journal article supplement (PMC1976572)
Supplement: plntphys_pp.107.097261_4.pdf [file plntphys_pp.107.097261_4.pdf]

## Supplemental Data

**Supplemental Figure S1.** Expression of *DMI1* does neither restore growth of the *cch1Δmid1Δ* yeast mutant on  $\text{Ca}^{2+}$ -depleted medium nor growth of the *trk1Δtrk2Δtok1Δ* mutant on low- $\text{K}^+$  medium. Drop assays were repeated three times with similar results.

**Supplemental Figure S2:** Expression of *DMI1* delays re-growth of yeast after galactose starvation. Log-phase cultures of W303 yeast transformed with pYES2 (white dots) or pYES2:DMI1 (black dots) were starved for 14 h in hexose-free SC medium. An equal volume of SC (galactose) medium was added at 0 min and cell numbers were determined at the indicated time points. Data are the means  $\pm$  SEM of three cultures.

**Supplemental Figure S3:** Expression levels of *DMI1* and *dmi1-2* in wild-type plants and *dmi1-2* alleles respectively. No significant difference in the expression level of these two alleles was observed. *MtActin2* expression was used as a reference.
