# Supplementary material
Source: PubMed Central journal article supplement (PMC1976572)

Supplemental  
Figure S1

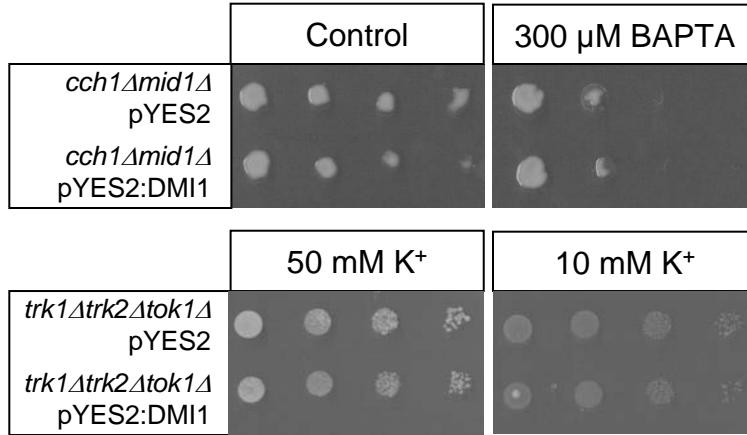

Supplement: plntphys_pp.107.097261_1.pdf [file plntphys_pp.107.097261_1.pdf]

Supplemental  
Figure S2

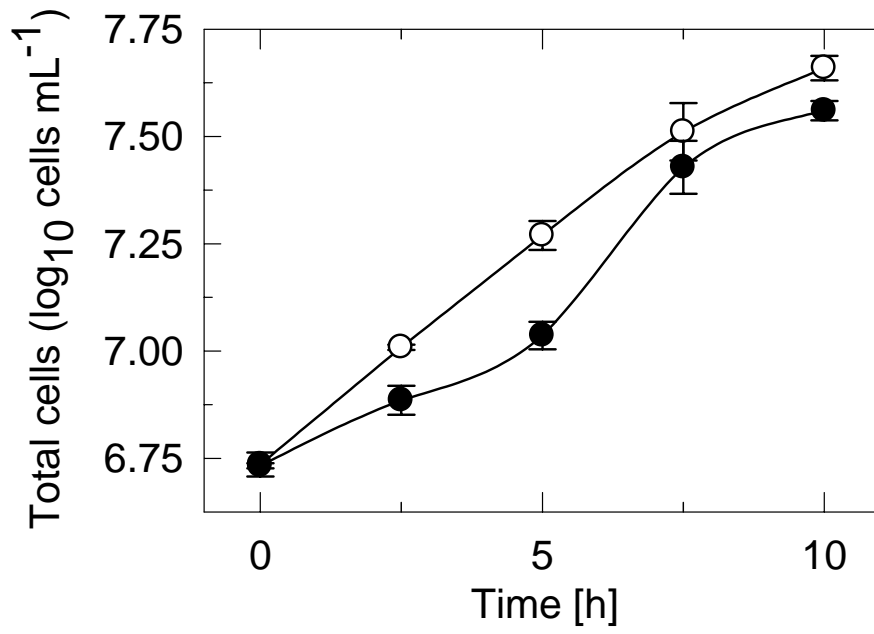

Supplement: plntphys_pp.107.097261_2.pdf [file plntphys_pp.107.097261_2.pdf]

Supplemental  
Figure S3

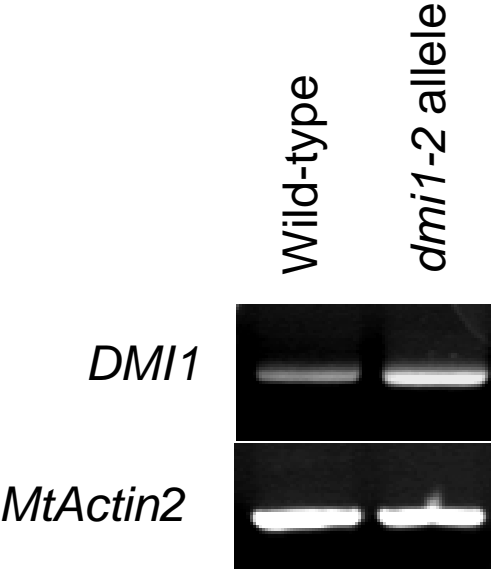

Supplement: plntphys_pp.107.097261_3.pdf [file plntphys_pp.107.097261_3.pdf]
